# Supplementary material for: Overexpression of REST Represses the Epithelial–Mesenchymal Transition Process and Decreases the Aggressiveness of Prostate Cancer Cells
Source: MDPI journal article supplement (doi:10.3390/ijms25063332), 2024-03-15
Supplement: s1 [file s1]

# Supplementary Material:

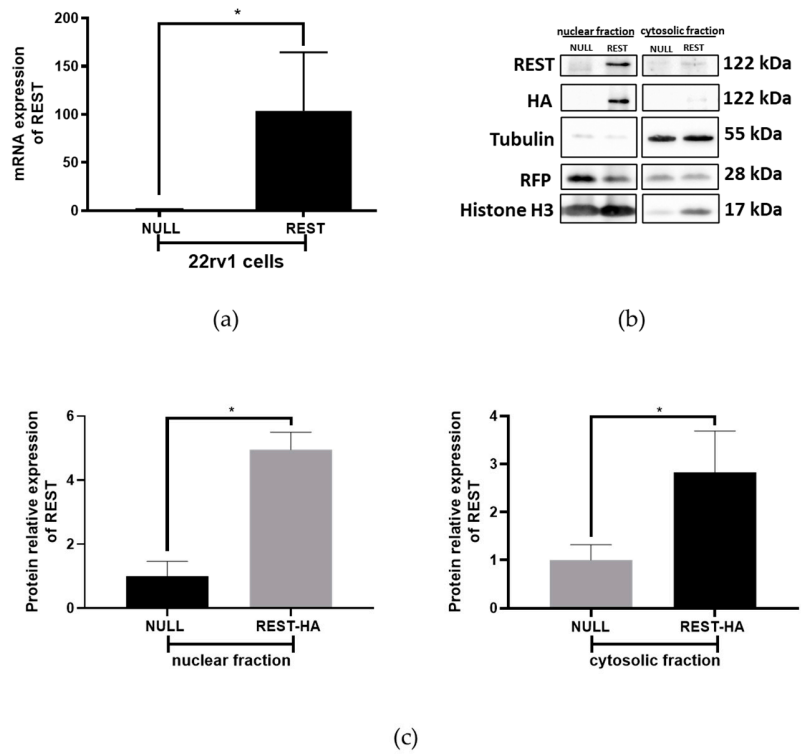

**Supplementary Figure S1. Overexpression of REST in the 22rv1 cell line.** (a) Levels of REST transcripts in the 22rv1 cell line transduced with overexpression vector, and in the control line (NULL); (b) Protein expression of REST, HA and RFP in nuclear and cytosolic fractions of the 22rv1 REST-HA and NULL cell line; (c) Graphical representation of REST protein levels in nuclear (left) and cytosolic (right) fractions of 22rv1 REST-HA and NULL cells. Mann-Whitney U test, p values <0.05 are considered significant, N=4.

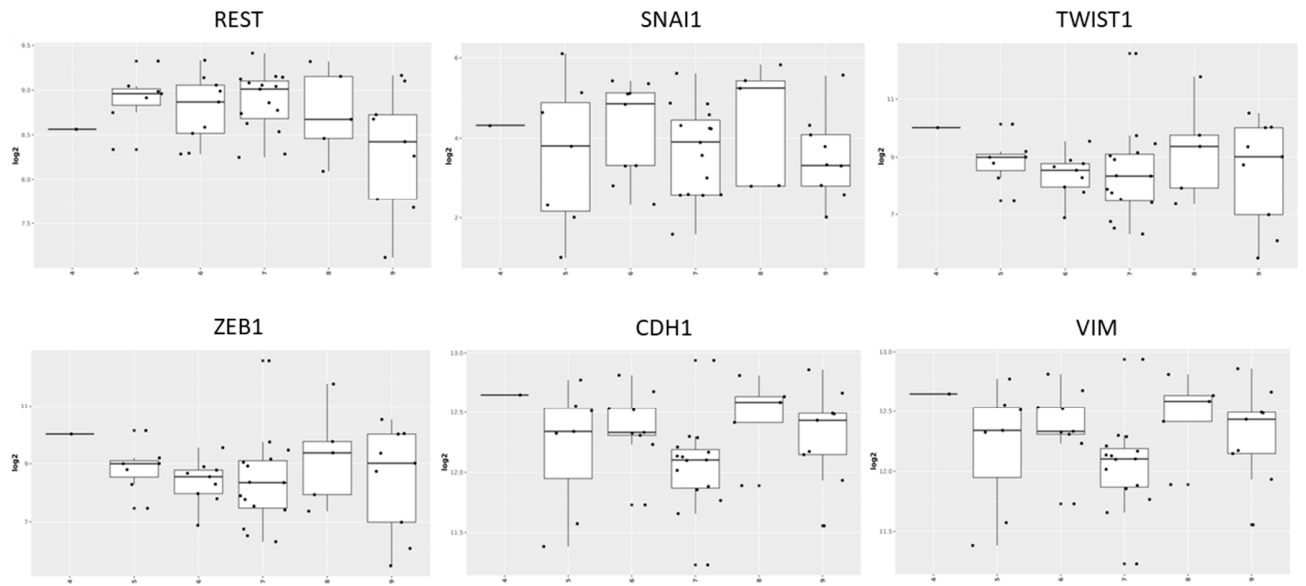

**Supplementary Figure S2: Boxplot for REST, SNAI1 (Snail), TWIST1, ZEB1, CDH1 (E-cadherin) and VIM (vimentin) expression profile across prostate cancer subtypes. X axis represents Gleason Scores. Data was obtained from Gene Expression database of Normal and Tumor tissues (GENT2, <http://gent2.apex.kr/gent2/>).**

**Supplementary Table S1. Sequences of primers used for gene expression determination.**

| <b>Gene name</b> | <b>Forward primer (5'– to 3')</b> | <b>Reverse primer (5'– to 3')</b> |
|------------------|-----------------------------------|-----------------------------------|
| AR               | CAGACCCTGAAGAAAGGCTGA             | TGGAGGGAGTCAGCAATCAAG             |
| ARv7             | GTCCATCTTGTCGTCTTCGGA             | GTCAGCCTTTCTTCAGGGTCT             |
| CDH1             | GAACGCATTGCCACATACAC              | ATTCGGGCTTGTTGTCATTC              |
| GAPDH            | AGGGGCCATCCACAGTCTTC              | AGAAGGCTGGGGCTCATTTG              |
| KLK3             | GTCCTCACAGCTGCCCAG                | AGCTGTGGCTGCCTGAAAT               |
| REST             | TGCGTACTCATTCAAGTGAGA             | TCTTGCATGGCGGGTTACTT              |
| SNAI1            | TTCCAGCAGCCCTACGACCAG             | GCCTTTCCCACTGTCCTCATC             |
| SNAI2            | CTCCATTCCACGCCCAGCTAC             | AGCCACTGTGGTCCTTGGAG              |
| TWIST1           | GGAGTCCGCAGTCTTACGAG              | TCTGGAGGACCTGGTAGAGG              |
| VIM              | GCCAAGGCAAGTCGCG                  | GCCAAGGCAAGTCGCG                  |
| ZEB1             | TTCACAGTGGAGAGAAGCCA              | GCCTGGTGATGCTGAAAGAG              |
